# Supplementary material for: Seed Priming by Low-Dose Radiation Improves Growth of Lactuca sativa and Valerianella locusta
Source: MDPI journal article supplement (doi:10.3390/plants13020165), 2024-01-08
Supplement: s1 [file s1]

*L. sativa*

| 2-way ANOVA    | DoF | SS   | MS    | F   | p     |
|----------------|-----|------|-------|-----|-------|
| Treatment      | 2   | 11   | 5.6   | 16  | 0.000 |
| Time           | 3   | 665  | 222   | 645 | 0.000 |
| Treatment*Time | 6   | 8.6  | 1.4   | 4.2 | 0.005 |
| Error          | 24  | 8.25 | 0.344 |     |       |
| Total          | 35  | 693  |       |     |       |

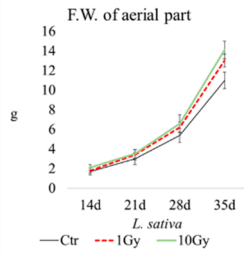

a)

*V. locusta*

| 2-way ANOVA    | DoF | SS      | MS     | F     | p     |
|----------------|-----|---------|--------|-------|-------|
| Treatment      | 2   | 0.14    | 0.07   | 26    | 0.000 |
| Time           | 3   | 1895161 | 631720 | 2,301 | 0.000 |
| Treatment*Time | 6   | 0.26    | 0.04   | 16    | 0.000 |
| Error          | 24  | 0.07    | 0.002  |       |       |
| Total          | 35  | 1941750 |        |       |       |

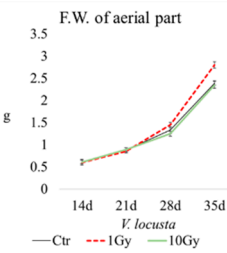

b)

| 2-way ANOVA    | DoF | SS      | MS      | F     | p     |
|----------------|-----|---------|---------|-------|-------|
| Treatment      | 2   | 0.00041 | 0.00021 | 5     | 0.014 |
| Time           | 3   | 0.1091  | 0.03637 | 905   | 0.000 |
| Treatment*Time | 6   | 0.00576 | 0.00096 | 23.89 | 0.000 |
| Error          | 24  | 0.00096 | 0.00004 |       |       |
| Total          | 35  | 0.11624 |         |       |       |

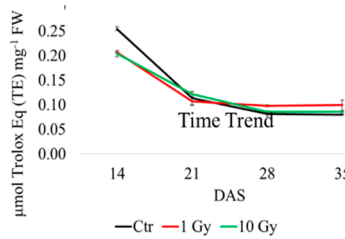

c)

| 2-way ANOVA    | DoF | SS      | MS      | F  | p     |
|----------------|-----|---------|---------|----|-------|
| Treatment      | 2   | 0.04332 | 0       | 8  | 0.003 |
| Time           | 3   | 0.22426 | 0       | 26 | 0.000 |
| Treatment*Time | 6   | 0.10455 | 0       | 6  | 0.001 |
| Error          | 24  | 0.068   | 0.00283 |    |       |
| Total          | 35  | 0.44013 |         |    |       |

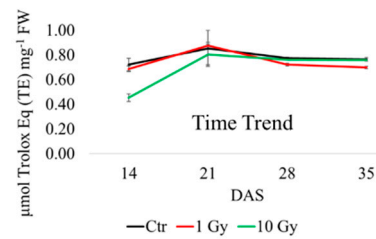

d)

| 2-way ANOVA    | DoF | SS   | MS  | F   | p     |
|----------------|-----|------|-----|-----|-------|
| Treatment      | 2   | 760  | 380 | 27  | 0.000 |
| Time           | 3   | 776  | 258 | 18  | 0.000 |
| Treatment*Time | 6   | 71   | 12  | 0.9 | 0.500 |
| Error          | 72  | 1017 | 14  |     |       |
| Total          | 83  | 2627 |     |     |       |

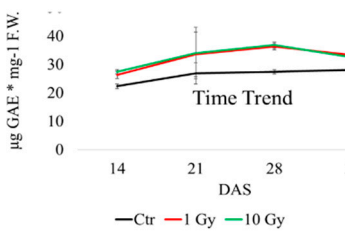

e)

| 2-way ANOVA    | DoF | SS    | MS   | F    | p     |
|----------------|-----|-------|------|------|-------|
| Treatment      | 2   | 10854 | 5427 | 69   | 0.000 |
| Time           | 3   | 620   | 207  | 3    | 0.050 |
| Treatment*Time | 6   | 1380  | 230  | 2.93 | 0.010 |
| Error          | 96  | 7541  | 79   |      |       |
| Total          | 107 | 20395 |      |      |       |

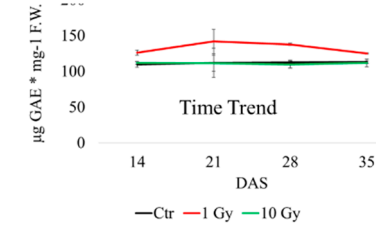

f)

**Figure S2.** Results of the two-way ANOVA and time trends with reference to the Figures 3 (a,b),4 (c,d) and 5 (e,f) of the text. In red, factors significantly affecting the dependent variables.
