# Supplementary figures and images for: Seed Priming by Low-Dose Radiation Improves Growth of Lactuca sativa and Valerianella locusta
Source: MDPI journal article supplement (doi:10.3390/plants13020165), 2024-01-08

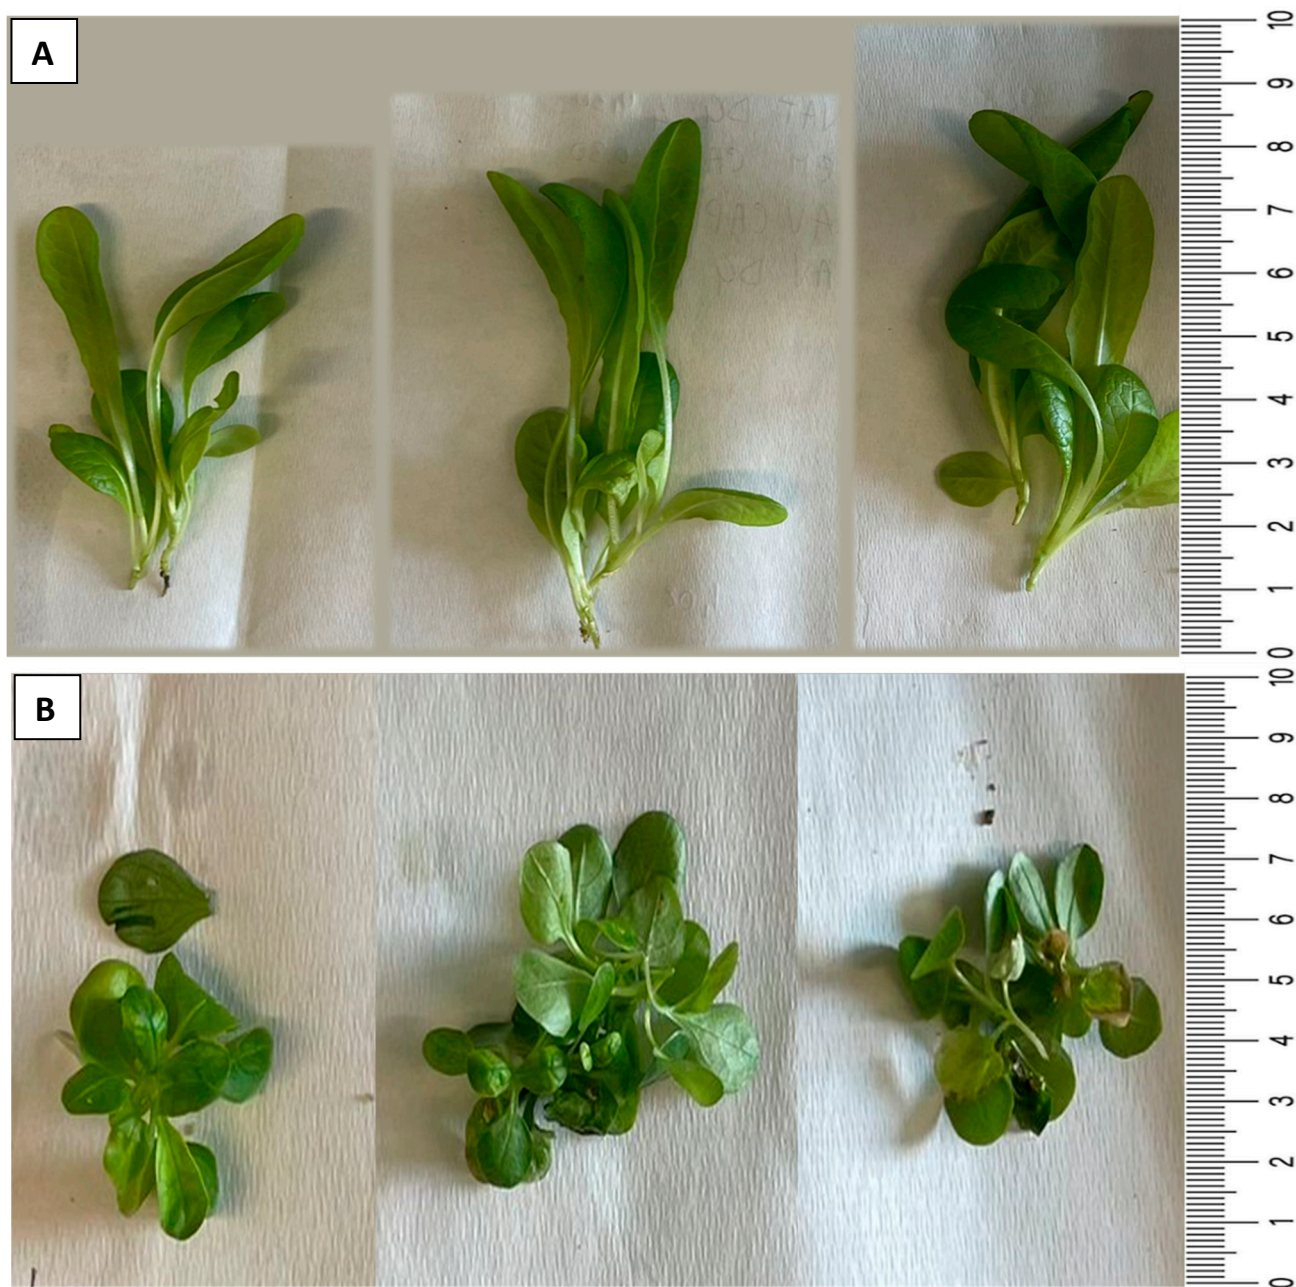

**Figure S1.** 21 day old seedlings. A) *L. sativa*; B) *V. locusta*

Supplement: s1 [file s1]
